# Supplementary material for: Biological Activity of Novel Organotin Compounds with a Schiff Base Containing an Antioxidant Fragment
Source: MDPI journal article supplement (doi:10.3390/ijms24032024), 2023-01-19
Supplement: s1 [file s1]

**Supplementary Materials**

**for**

# **Biological Activity of Novel Organotin Compounds with a Schiff Base Containing an Antioxidant Fragment**

Taisiya A. Antonenko<sup>1</sup>, Yulia A. Gracheva<sup>1</sup>, Dmitry B. Shpakovsky<sup>1</sup>, Mstislav A. Vorobyev<sup>2</sup>, Dmitrii M. Mazur<sup>1</sup>, Victor A. Tafeenko<sup>1</sup>, Yury F. Oprunenko<sup>1</sup>, Elena F. Shevtsova<sup>3</sup>, Pavel N. Shevtsov<sup>3</sup>, Alexey A. Nazarov<sup>1,\*</sup>  
and Elena R. Milaeva<sup>1</sup>

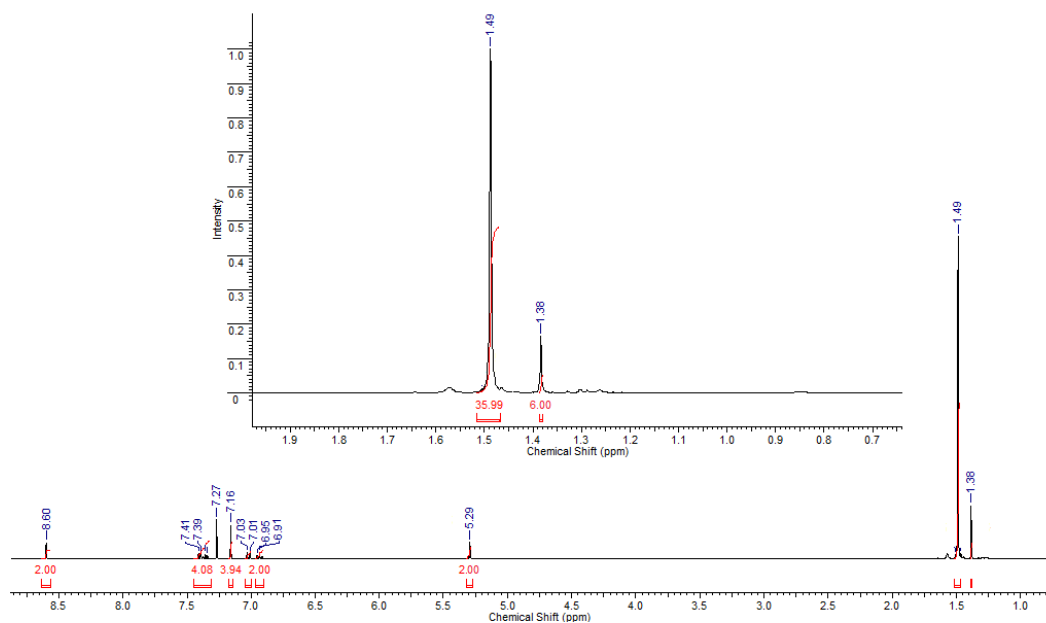

**Figure S1.** The  $^1\text{H}$  NMR spectra of **1**.

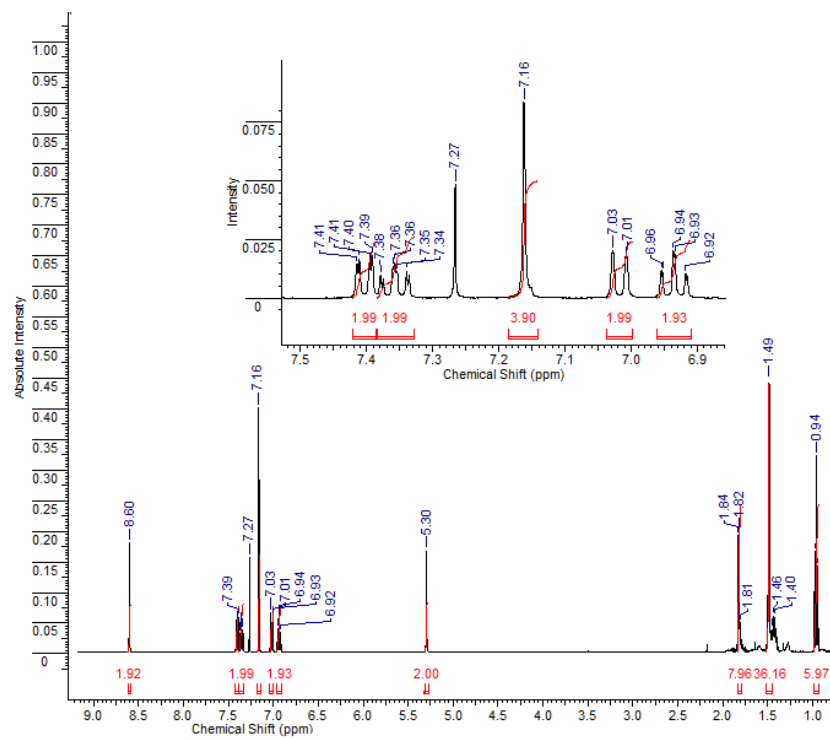

**Figure S2.** The  $^1\text{H}$  NMR spectra of **2**.

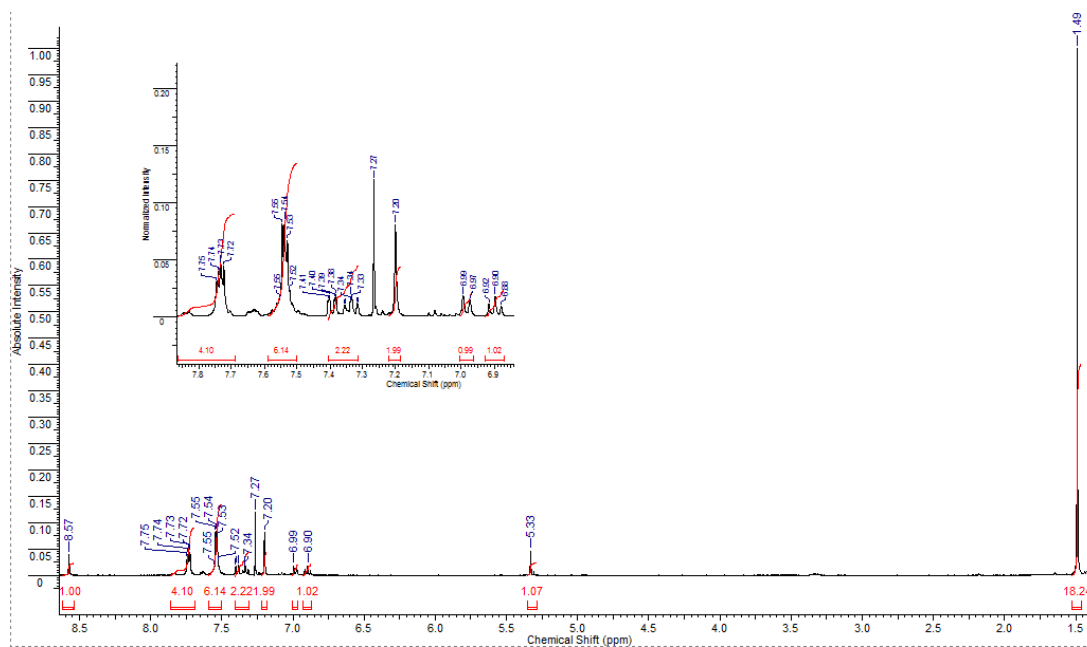

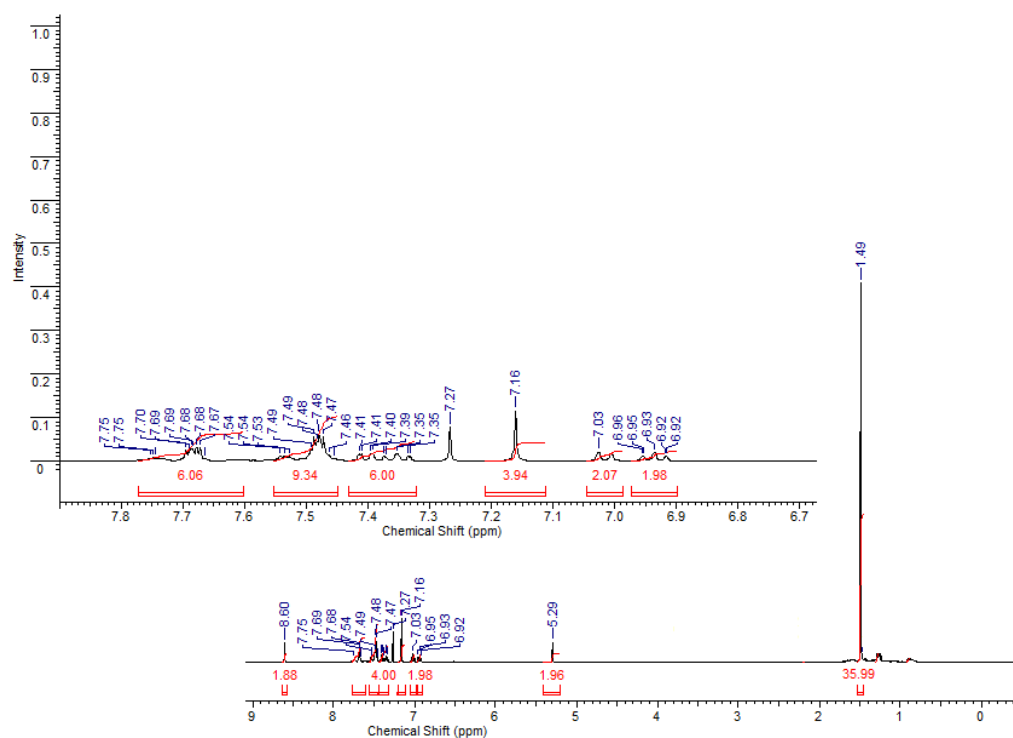

**Figure S5.** The  $^1\text{H}$  NMR spectra of **5**.

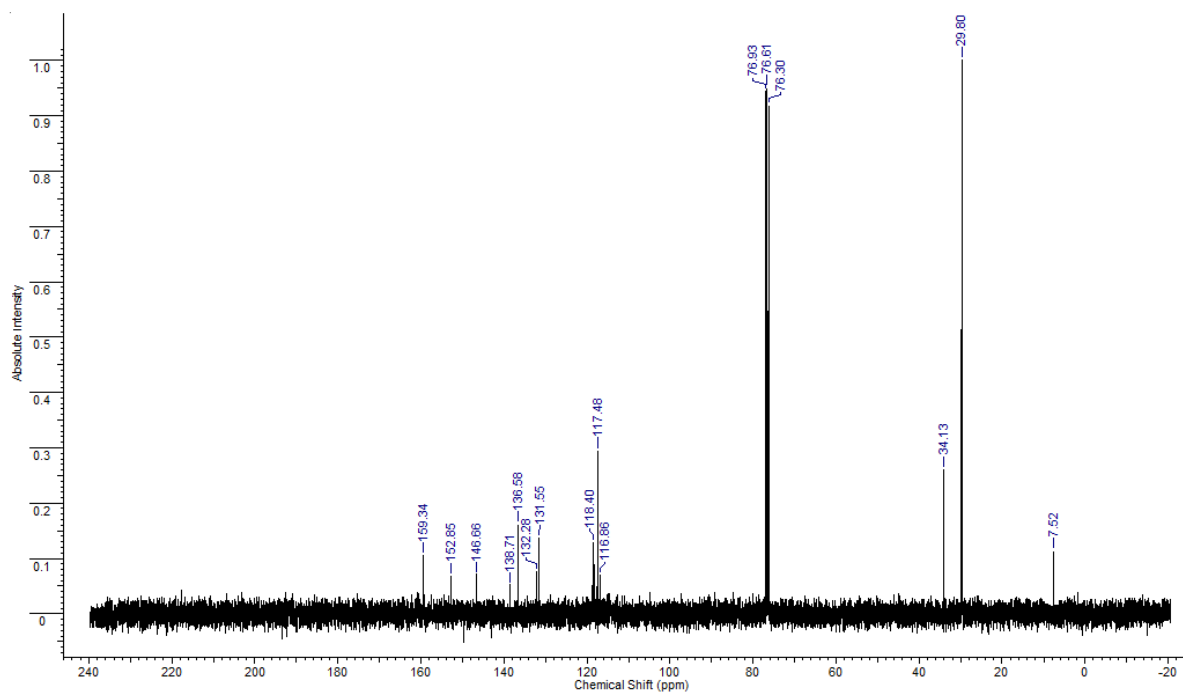

**Figure S6.** The  $^{13}\text{C}$  NMR spectra of **1**.

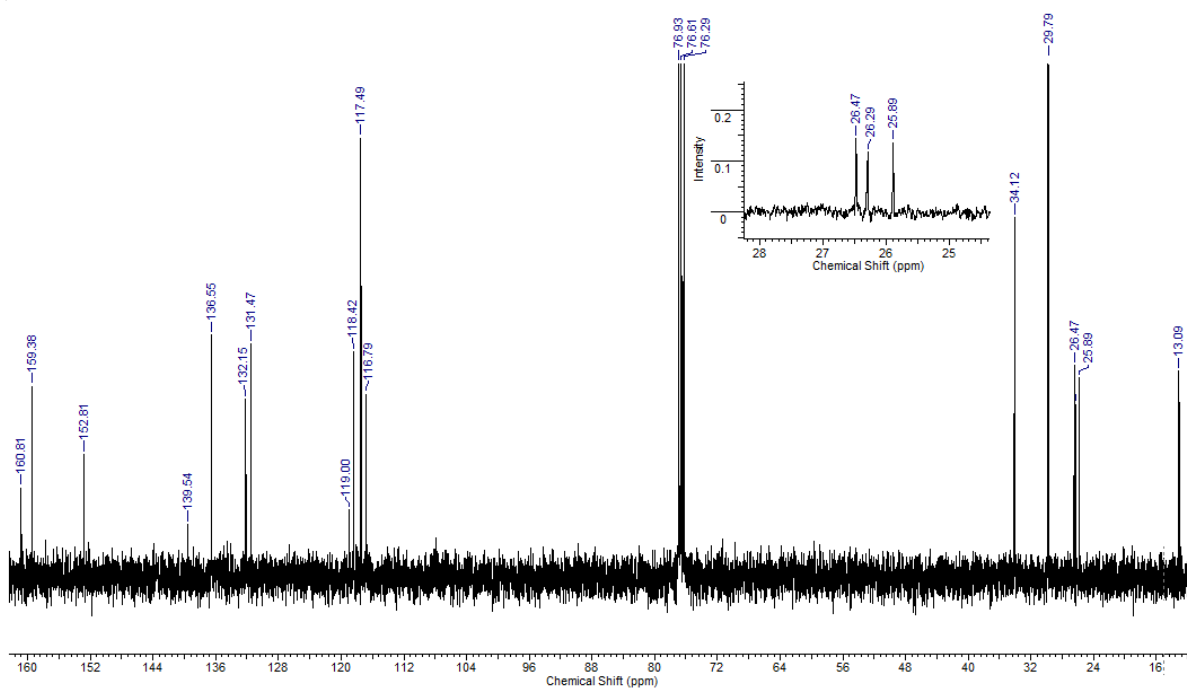

Figure S7. The  $^{13}\text{C}$  NMR spectra of **2**.

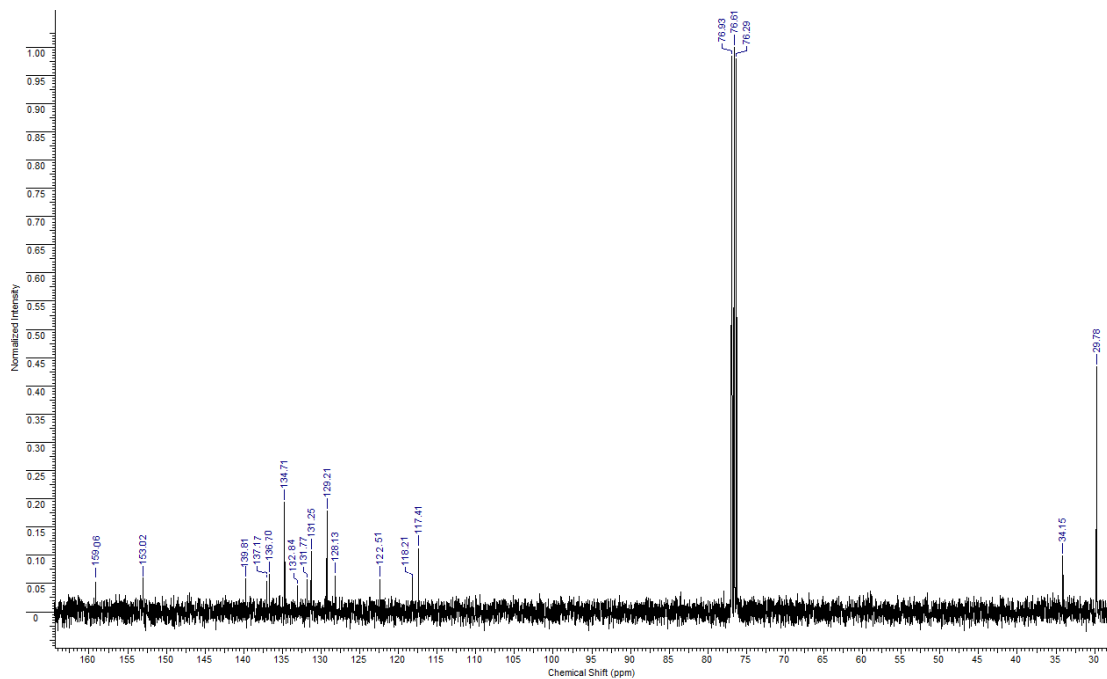

Figure S8. The  $^{13}\text{C}$  NMR spectra of **3**.

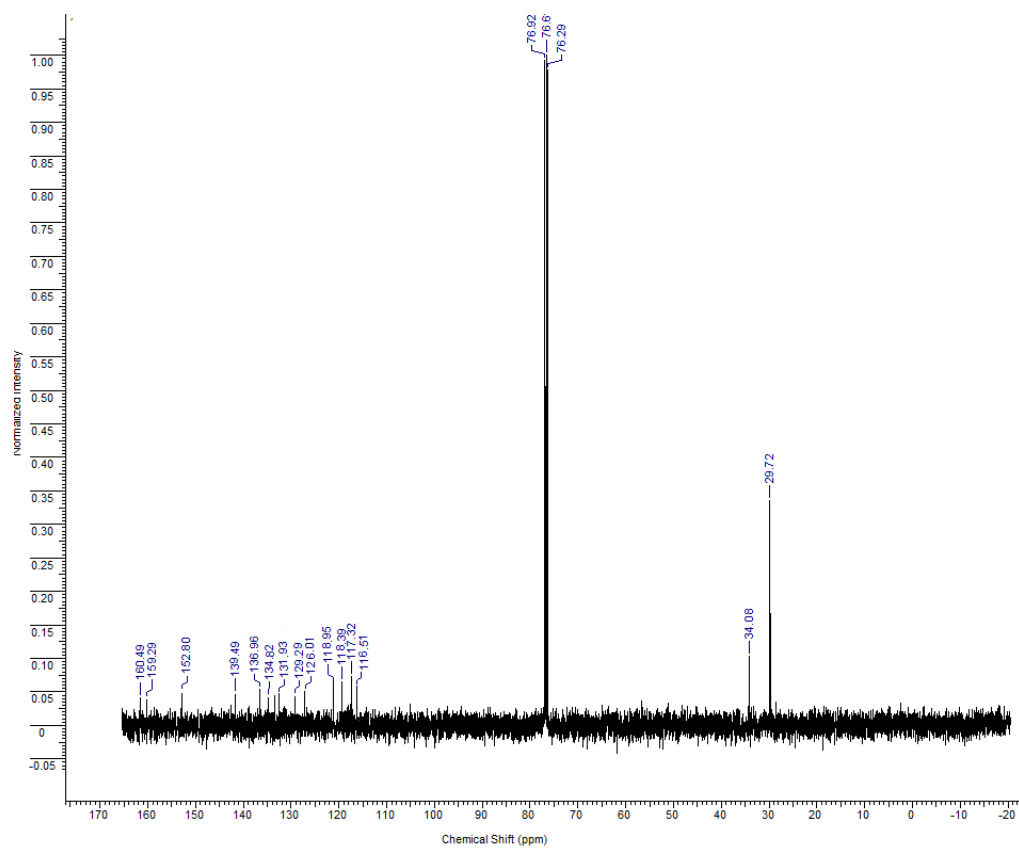

Figure S9. The  $^{13}\text{C}$  NMR spectra of 4.

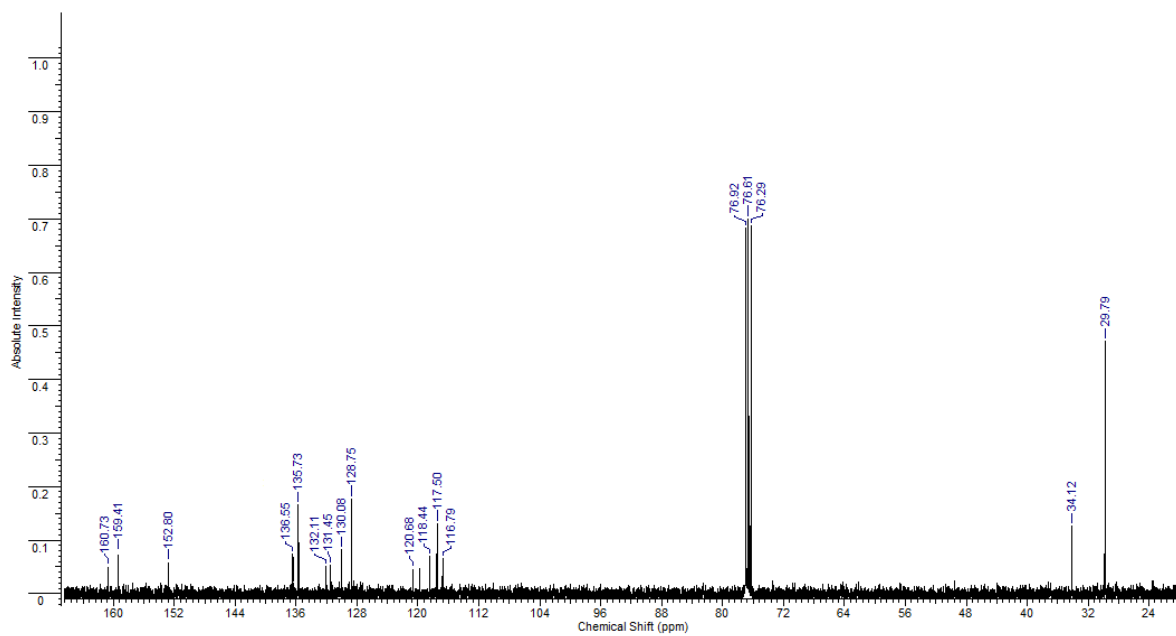

Figure S10. The  $^{13}\text{C}$  NMR spectra of 5.

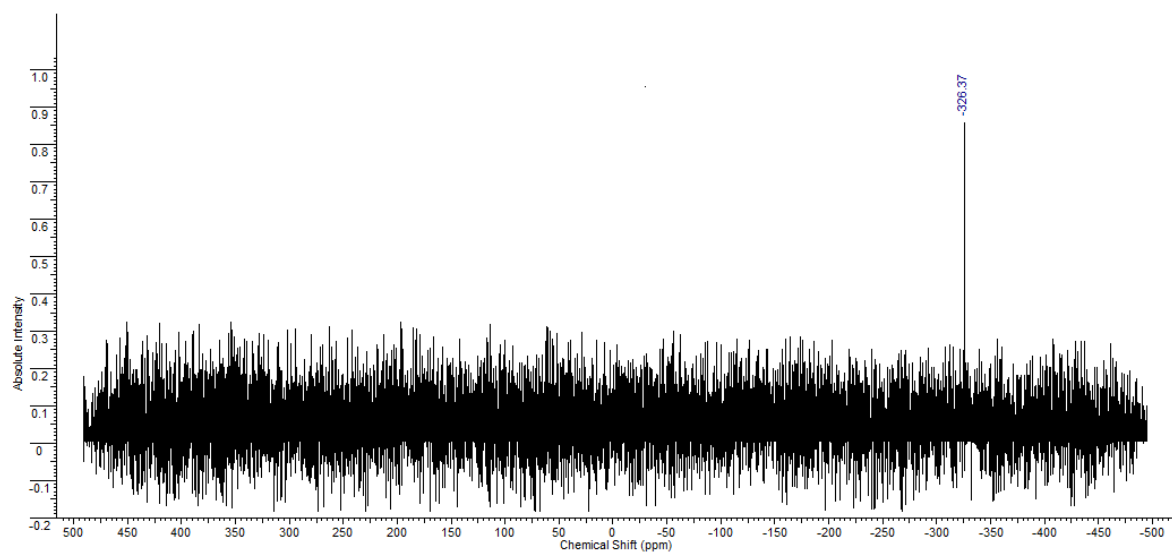

**Figure S11.** The  $^{119}\text{Sn}$  NMR spectra of **1**.

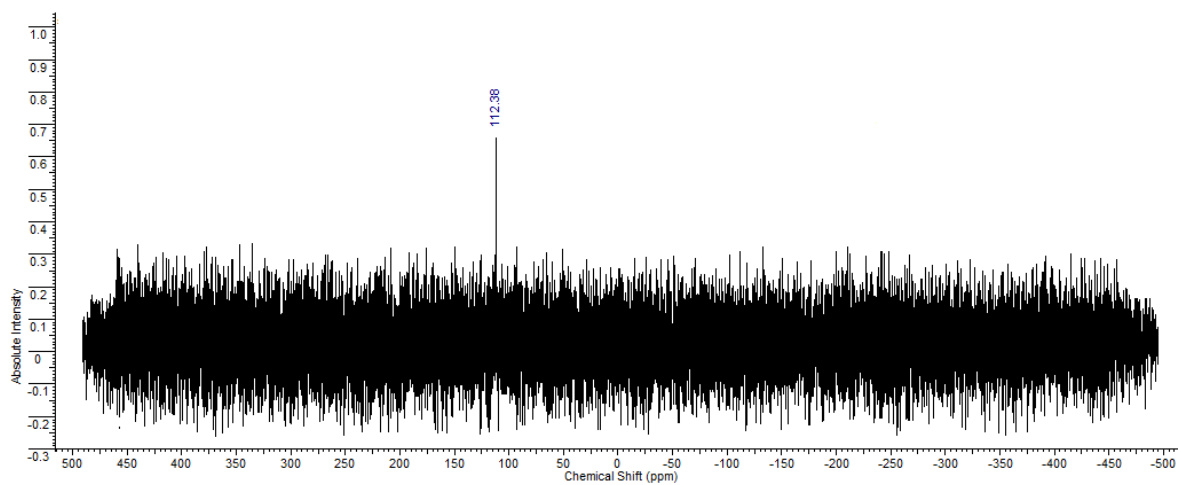

**Figure S12.** The  $^{119}\text{Sn}$  NMR spectra of **2**.

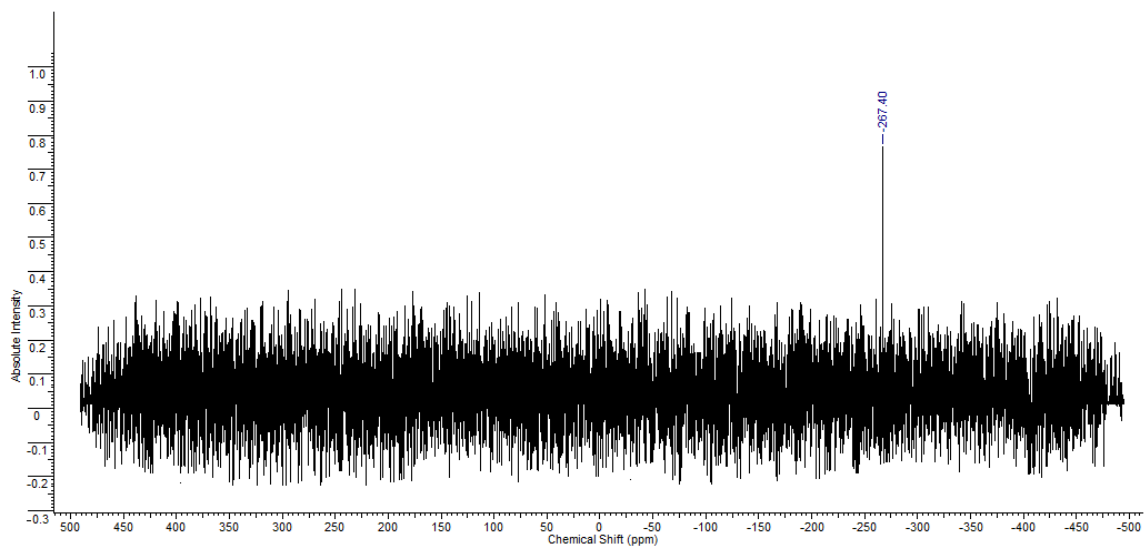

**Figure S13.** The  $^{119}\text{Sn}$  NMR spectra of **3**.

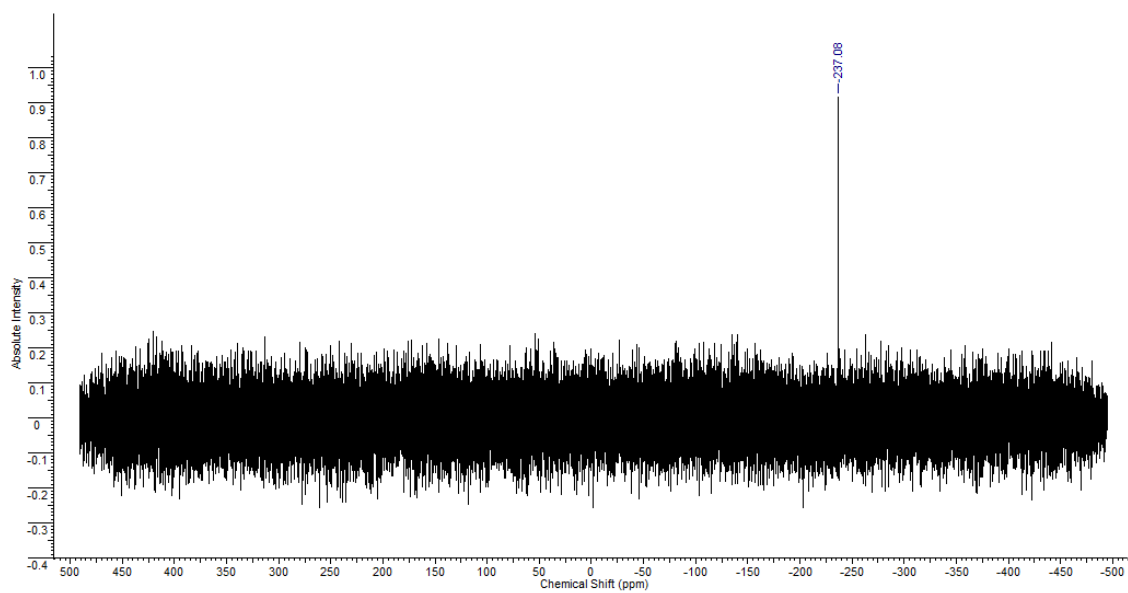

**Figure S14.** The  $^{119}\text{Sn}$  NMR spectra of **4**.

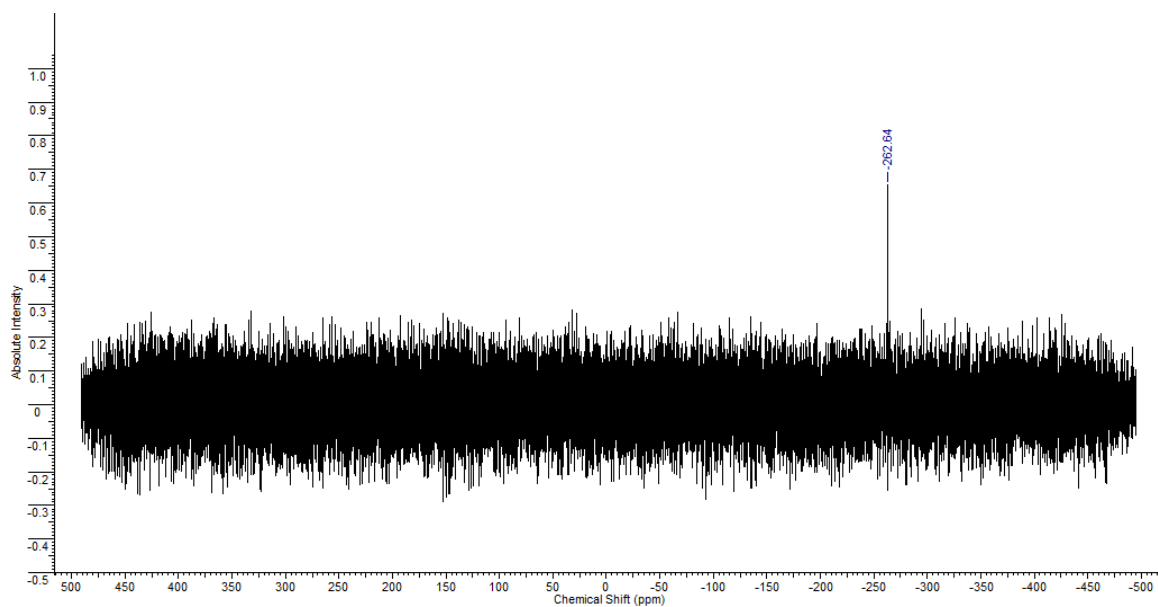

**Figure S15.** The  $^{119}\text{Sn}$  NMR spectra of **5**.



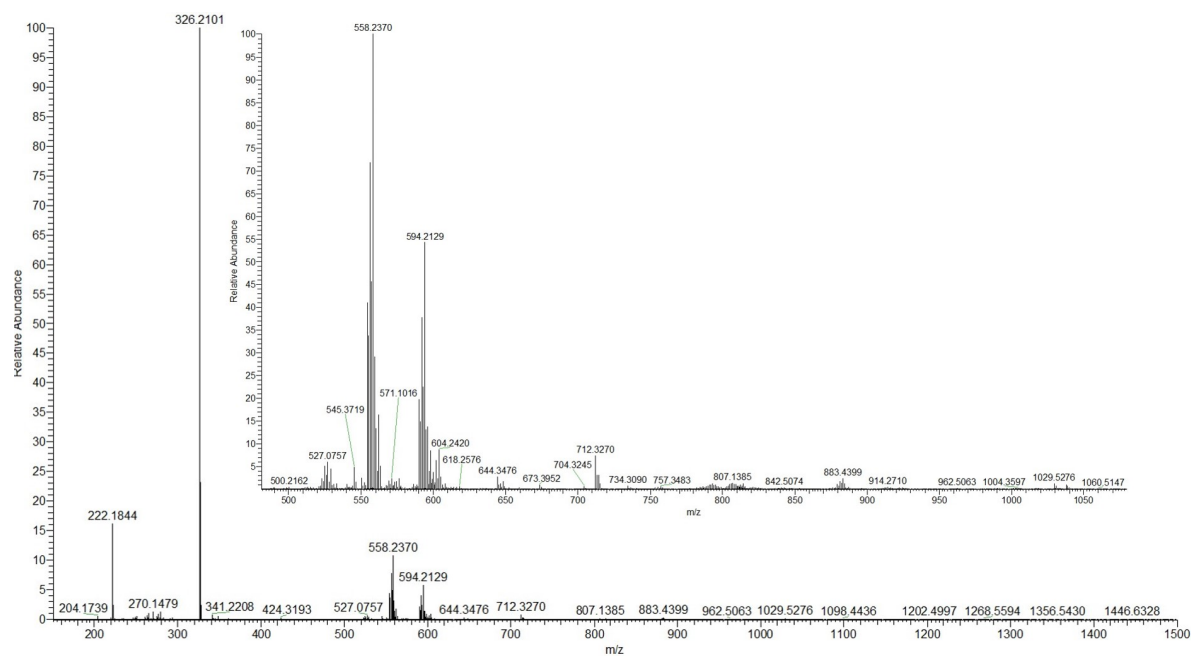

**Figure S16.** ESI mass spectrum of **2**.

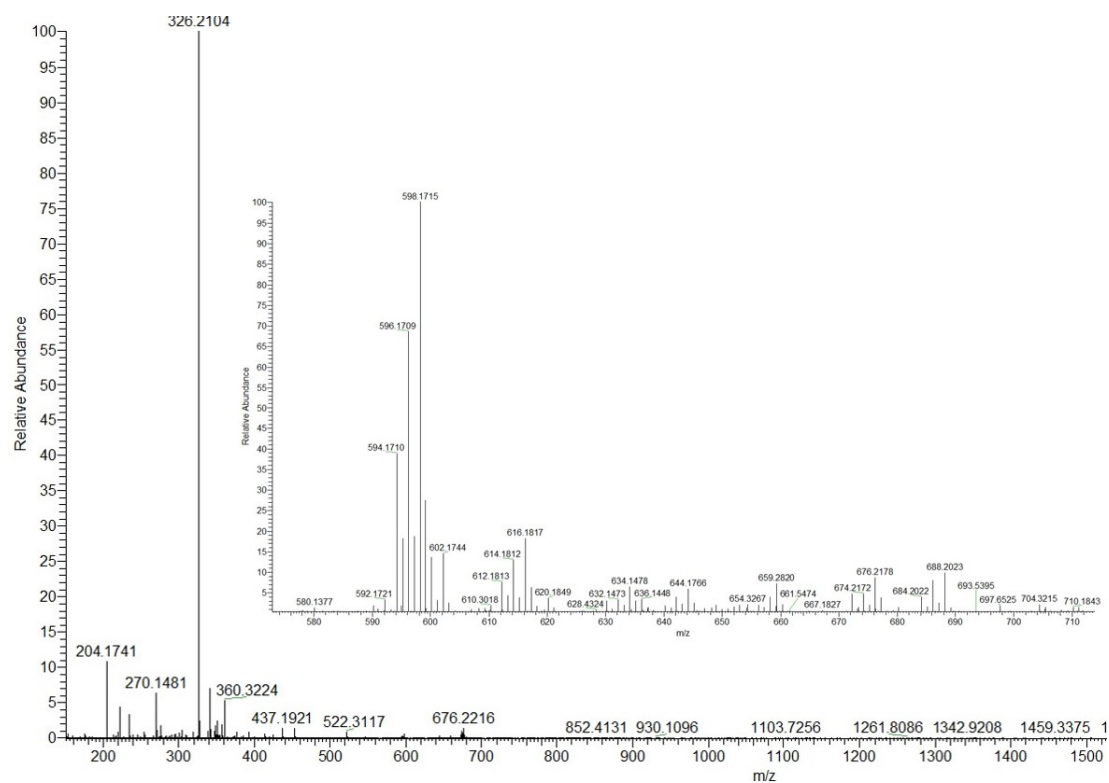

**Figure S17.** ESI mass spectrum of **3**.

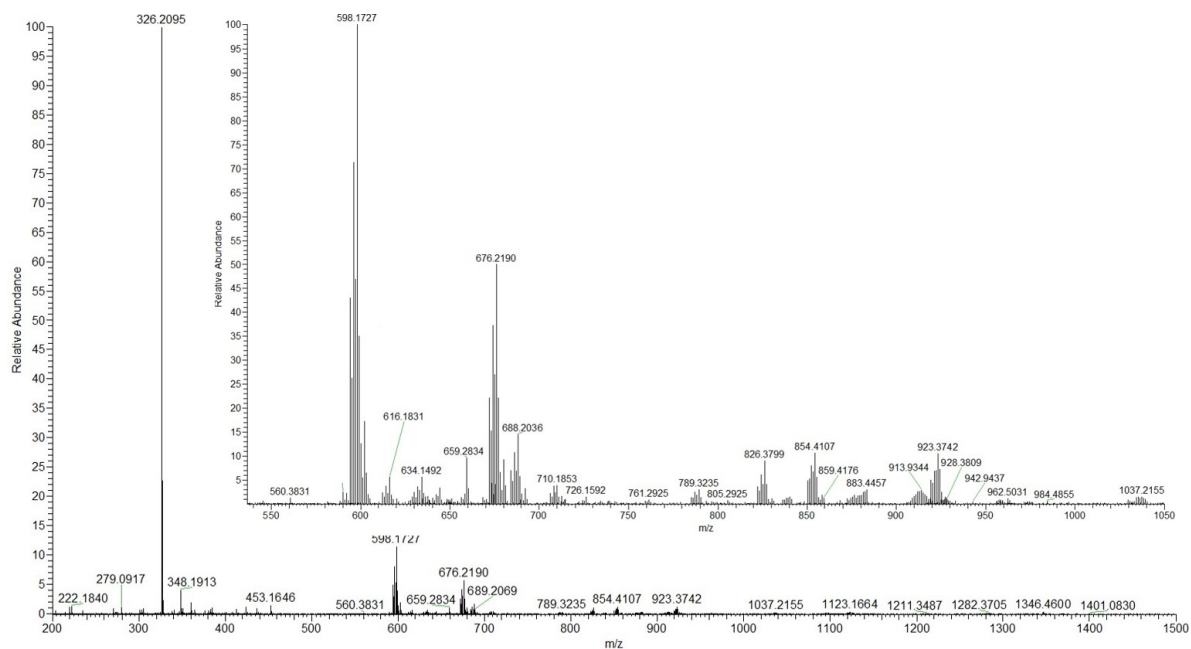

Figure S18. ESI mass spectrum of 4.

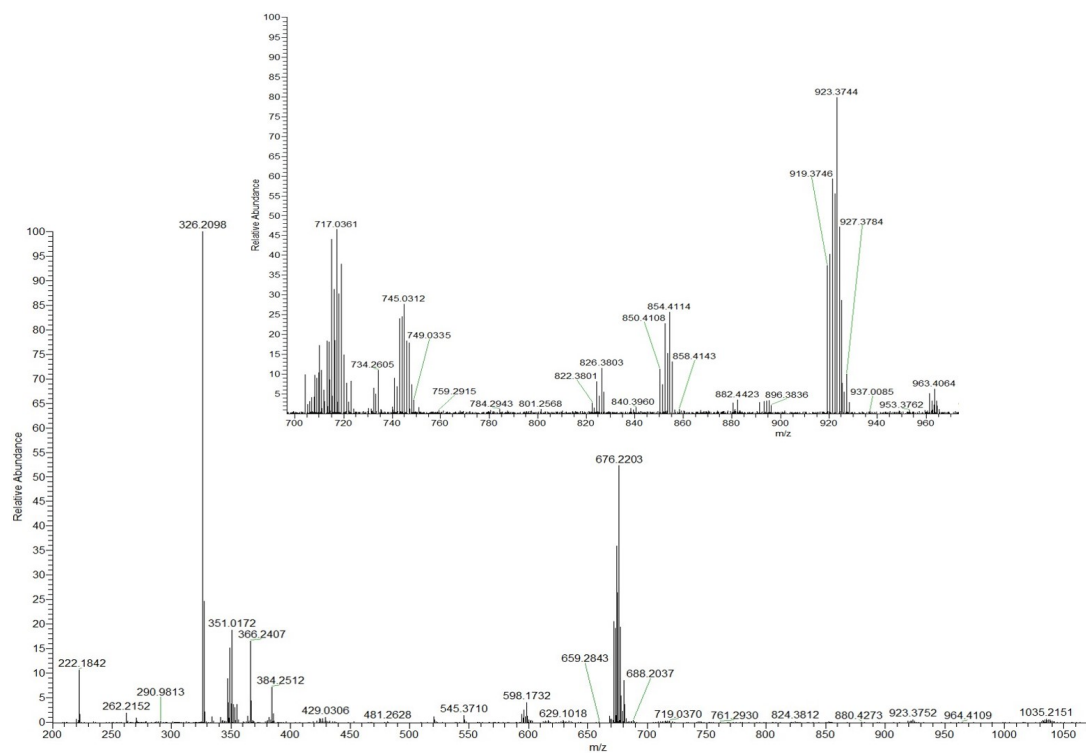

Figure S19. ESI mass spectrum of 5.
